# Supplementary material
Source: Springer Nature journal article supplement (https://www.springermedizin.de/resource/supplementary/11689_2013_71_MOESM7_ESM.pdf/9673168)

# Absolute Pupil Size

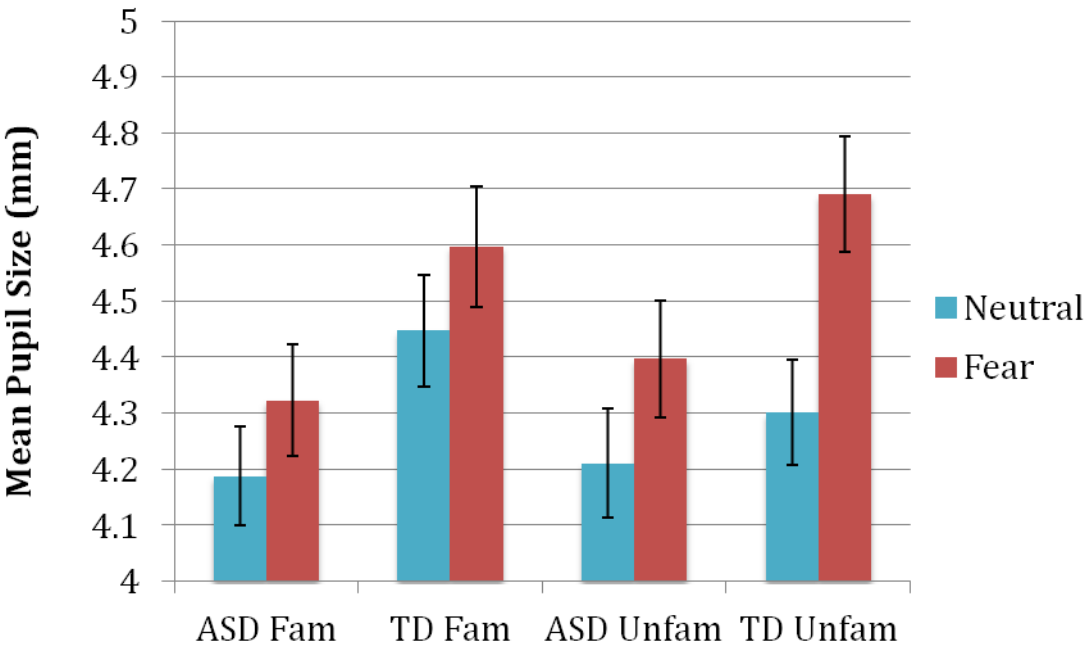

Supplement: MOESM7 [file 9673168]
